# Supplementary material
Source: publisher figshare collection journal article supplement (https://acs.figshare.com/ndownloader/files/3944020)
Supplement: Supplementary file 1 [file 3944020]

98
Molecule 3b, Single point energy = -1968.43740107 a.u.
Hf      0.124100   -0.726800   -0.527400
N      -0.108100    1.135200   -0.264700
N      -0.262000    2.439100    0.093000
C      -0.098300    2.792500    1.444400
C      -0.356800    1.850500    2.455100
H      -0.725800    0.873500    2.166000
C      -0.160300    2.178000    3.793100
H      -0.385500    1.436600    4.557300
C       0.306200    3.439300    4.164500
H       0.456900    3.689600    5.211200
C       0.577200    4.373500    3.163200
H       0.956300    5.359000    3.425700
C       0.386100    4.060500    1.821700
H       0.620800    4.795800    1.058100
C      -0.584300    3.390800   -0.890600
C      -1.412300    4.494900   -0.613600
H      -1.808400    4.632100    0.387900
C      -1.736000    5.400300   -1.618900
H      -2.384300    6.241400   -1.382700
C      -1.259100    5.230800   -2.920300
H      -1.520300    5.939700   -3.701300
C      -0.449100    4.129800   -3.200100
H      -0.065000    3.978800   -4.207100
C      -0.117400    3.218300   -2.202600
H       0.507400    2.358900   -2.410700
N       0.305600   -2.071400    1.355500
N      -1.717200   -1.313500    0.752500
C       1.017600   -2.690900    2.461200
H       1.983000   -2.201200    2.633500
H       1.227800   -3.752100    2.244500
C       0.074800   -2.549500    3.675200
H       0.177900   -3.367900    4.394900
H       0.290900   -1.611400    4.199200
C      -1.320200   -2.475400    3.037100
H      -1.773500   -3.471700    2.946400
H      -2.034500   -1.841100    3.570000
C      -0.984800   -1.940400    1.659600
C      -3.072600   -0.999200    0.890300
C      -3.519900    0.239300    0.397900
H      -2.783500    0.910300   -0.037400
C      -4.862100    0.604000    0.477500
C      -5.775300   -0.290000    1.053900
H      -6.827400   -0.015300    1.116400
C      -5.362400   -1.531200    1.539000
C      -4.011100   -1.882400    1.443500
H      -3.693900   -2.868000    1.774200
C      -5.328400    1.940200   -0.042300
H      -5.743600    2.556900    0.765100
H      -6.118700    1.821900   -0.794300
H      -4.507600    2.499600   -0.501200
C      -6.350000   -2.482900    2.166200
H      -7.375600   -2.257800    1.855200
H      -6.320400   -2.423000    3.262700
H      -6.135900   -3.522900    1.893900
N       2.442300   -0.476600   -0.076800
N       6.467700    0.120600    0.989300
C       2.985200    0.757000   -0.011400
H       2.306100    1.571800   -0.236000
C       4.300800    1.002100    0.331000
H       4.640700    2.030100    0.362000
C       5.163900   -0.073200    0.646200
C       4.585500   -1.363600    0.585400
H       5.157400   -2.254000    0.817900
C       3.258900   -1.502300    0.228100
H       2.809700   -2.489600    0.188900
C       7.003000    1.466900    1.071800
H       6.941300    1.983800    0.105200
H       8.053900    1.417300    1.360300
H       6.472300    2.069300    1.821100
C       7.307100   -1.013600    1.323600
H       6.937000   -1.548700    2.209100
H       8.316500   -0.661200    1.540100
H       7.370800   -1.725500    0.490300
C      -0.999100   -1.156600   -2.756800
C       0.374100   -0.898100   -3.065400
C       1.146000   -2.003800   -2.598000
C       0.260300   -2.943800   -1.998900
C      -1.063100   -2.425900   -2.104300
C      -2.174800   -0.327400   -3.190100
H      -3.013000   -0.418900   -2.492300
H      -2.535000   -0.640300   -4.181200
H      -1.920000    0.734800   -3.246700
C       0.893900    0.184700   -3.965700
H       0.176800    1.003100   -4.066000
H       1.075800   -0.210900   -4.975900
H       1.841400    0.610100   -3.613800
C       2.599800   -2.211700   -2.905000
H       3.177400   -1.284200   -2.827800
H       2.724800   -2.584900   -3.931800
H       3.066200   -2.947700   -2.242200
C       0.622700   -4.293100   -1.449800
H       1.688100   -4.360200   -1.202100
H       0.413200   -5.091000   -2.176500
H       0.060800   -4.527400   -0.538800
C      -2.311800   -3.168200   -1.734600
H      -2.165900   -3.797200   -0.850000
H      -2.624000   -3.827600   -2.557500
H      -3.144100   -2.493600   -1.519100
107
Molecule 4, Single point energy = -2467.02756360 a.u.
Hf     -1.337000   -0.018100   -0.423700
Si     -1.227400   -0.795800    2.914200
Si     -1.940500   -3.048800    1.088900
N       0.075400   -1.206600   -1.720900
N       1.967500   -1.258600   -0.309000
N      -0.040300    1.215400    0.247400
N       0.991900    2.124100    0.464700
N      -1.626500   -1.328700    1.287800
H      -0.159300   -0.869200   -3.801000
H      -1.256800   -2.079300   -3.125700
H       0.996600   -2.878200   -4.459700
C       1.357700   -1.542300   -1.432800
C       3.334800   -1.592200   -0.153400
C       3.709200   -2.641400    0.697100
H       2.930100   -3.233600    1.172500
C       5.055800   -2.932800    0.933200
C       6.033000   -2.147400    0.313700
H       7.084600   -2.359300    0.502000
C       5.689300   -1.090100   -0.534700
C       4.336400   -0.818000   -0.756600
H       4.042100    0.017700   -1.388300
C       5.446100   -4.088800    1.818700
H       6.394700   -3.898100    2.332300
H       5.573100   -5.009800    1.234000
H       4.683200   -4.289200    2.578500
C       6.756300   -0.268800   -1.212900
H       7.665700   -0.212000   -0.604900
H       6.413000    0.752500   -1.408500
H       7.038700   -0.708500   -2.179000
C       0.917200    2.922400    1.656500
C      -0.220000    3.674000    1.959300
H      -1.061300    3.647600    1.275800
C      -0.264200    4.437000    3.123800
H      -1.154700    5.017600    3.351900
C       0.827500    4.463600    3.992500
H       0.789100    5.059500    4.900500
C       1.968100    3.721400    3.688200
H       2.824700    3.735000    4.357400
C       2.012600    2.951300    2.526500
H       2.903400    2.377800    2.278200
C       1.670000    2.672400   -0.654600
C       1.618200    2.018700   -1.897300
H       1.031300    1.112400   -1.988500
C       2.316900    2.524800   -2.991300
H       2.260000    1.997500   -3.941400
C       3.077500    3.688200   -2.885100
H       3.618600    4.079100   -3.742300
C       3.121200    4.344200   -1.655500
H       3.695400    5.261500   -1.547200
C       2.428000    3.853600   -0.552400
H       2.472500    4.395700    0.385500
C       0.665300   -0.671300    3.203400
H       1.233500   -1.417200    2.629900
H       0.888600   -0.870400    4.258900
H       1.058700    0.340200    3.021300
C      -1.845000   -1.930800    4.310000
H      -1.499000   -1.497400    5.258100
H      -1.482400   -2.962500    4.271900
H      -2.939700   -1.956300    4.349500
C      -1.978900    0.873100    3.366700
H      -1.568900    1.212900    4.326600
H      -3.066400    0.792800    3.480800
H      -1.760400    1.643800    2.624300
C      -0.460200   -4.095000    1.655300
H      -0.208100   -3.972700    2.714200
H       0.423600   -3.815900    1.068500
H      -0.654700   -5.161900    1.483800
C      -3.507000   -3.686700    1.954500
H      -3.714600   -4.706800    1.605000
H      -4.379800   -3.072200    1.704900
H      -3.425900   -3.724900    3.044000
C      -2.178700   -3.525700   -0.726500
H      -2.507900   -4.572100   -0.770200
H      -1.245400   -3.443900   -1.289600
H      -2.941400   -2.925500   -1.231400
Li      1.310500    0.037100    0.957800
C       2.004100   -2.298200   -2.584800
H       2.624900   -1.599900   -3.162500
H       2.663900   -3.094200   -2.229000
C       0.800800   -2.774200   -3.387800
H       0.457700   -3.746200   -3.012500
C      -0.237600   -1.692400   -3.076000
C      -3.532300    1.284800   -0.502800
C      -3.905600    0.025400   -1.067500
C      -3.268600   -0.096100   -2.332300
C      -2.484200    1.084300   -2.543700
C      -2.671500    1.946600   -1.429700
C      -4.158100    1.886200    0.722000
H      -4.344700    1.135500    1.495300
H      -5.126200    2.344400    0.472400
H      -3.535200    2.666500    1.168200
C      -4.956600   -0.883800   -0.504000
H      -4.932800   -1.876600   -0.963100
H      -5.961500   -0.472200   -0.678300
H      -4.843300   -1.017100    0.576900
C      -3.627600   -1.106800   -3.385400
H      -2.937600   -1.078900   -4.233400
H      -4.628900   -0.889600   -3.783700
H      -3.652700   -2.137200   -3.014700
C      -1.780000    1.494000   -3.805900
H      -0.802700    1.947700   -3.605600
H      -2.373400    2.241900   -4.351600
H      -1.625400    0.652100   -4.486700
C      -2.182400    3.363000   -1.361100
H      -2.458300    3.836300   -0.414600
H      -2.639000    3.962500   -2.161300
H      -1.096000    3.439500   -1.472700
125
Molecule 8, energetically favored isomer, Single point energy = -2353.312336 a.u., G = -2353.407424 a.u.
Zr     -0.554500   -0.268400   -0.672500
N      -1.006000   -1.937200    0.760800
N      -2.676000   -0.441500    0.538500
N       0.109200    1.721000   -0.150200
C      -0.609700   -3.122500    1.512900
H       0.441300   -3.081000    1.784200
H      -0.754500   -4.022900    0.897100
C      -1.532700   -3.117500    2.740400
H      -1.717200   -4.118800    3.141400
H      -1.082200   -2.507400    3.530800
C      -2.800600   -2.440300    2.210100
H      -3.469800   -3.188700    1.767700
H      -3.378300   -1.880300    2.950800
C      -2.220600   -1.547300    1.126700
C      -4.027900   -0.058400    0.642600
C      -4.393700    1.287200    0.490700
H      -3.623600    2.022900    0.313800
C      -5.721100    1.711700    0.576300
C      -6.723100    0.768700    0.809700
H      -7.761600    1.089000    0.875300
C      -6.406400   -0.585100    0.940200
C      -5.073300   -0.983800    0.838600
H      -4.858400   -2.044700    0.870600
C      -6.057300    3.175900    0.449200
H      -5.947100    3.692200    1.412000
H      -7.090800    3.322100    0.118100
H      -5.398600    3.681100   -0.265600
C      -7.487700   -1.605700    1.190400
H      -8.426300   -1.323500    0.701500
H      -7.698500   -1.704100    2.263700
H      -7.200600   -2.596900    0.823100
N       1.500700   -0.656600   -0.161300
C       1.282000    2.366600    0.301000
C       2.343000    0.411400   -0.626300
N       2.429000    1.542200    0.243100
N       1.204700    3.594400    0.669600
N       2.872400    0.294000   -1.778800
C       3.548200    1.252600   -2.639600
H       2.907200    1.262700   -3.535300
C       3.687500    1.874500    0.949500
H       4.072400    2.816800    0.541600
C       4.773000    0.824600    0.727700
H       4.453000   -0.162700    1.072700
H       5.077300    0.738500   -0.316100
H       5.652500    1.116000    1.312200
C       3.473600    2.053100    2.457200
H       2.556200    2.598800    2.681300
H       3.421600    1.086600    2.962400
H       4.318000    2.613400    2.877100
C       2.154900    4.611900    1.053200
H       3.167600    4.249900    1.269100
C       1.641900    5.301300    2.324600
H       2.326400    6.098800    2.638700
H       0.655300    5.743200    2.143500
H       1.545000    4.589400    3.151200
C       2.282400    5.650800   -0.069700
H       2.968800    6.452900    0.228700
H       2.664200    5.201200   -0.991100
H       1.307300    6.100400   -0.289400
C       3.718300    2.713800   -2.221100
H       2.780600    3.146300   -1.864700
H       4.479300    2.841200   -1.446200
H       4.046700    3.290300   -3.094800
C       4.878800    0.646800   -3.106700
H       4.734000   -0.376600   -3.465500
H       5.296700    1.246900   -3.922700
H       5.618200    0.620600   -2.299300
N       2.098200   -1.455500    0.836500
C       2.704800   -2.661100    0.401200
C       2.796200   -3.801900    1.223200
C       3.191800   -2.761800   -0.912000
C       3.364300   -4.980900    0.748600
H       2.423300   -3.780100    2.241100
C       3.753700   -3.948400   -1.374300
H       3.124200   -1.896200   -1.559700
C       3.851600   -5.070000   -0.553100
H       3.414300   -5.841500    1.411900
H       4.127600   -3.987500   -2.395400
H       4.296700   -5.991600   -0.917900
C       2.005900   -1.097800    2.196600
C       0.975800   -0.271600    2.675500
C       2.975200   -1.530100    3.125100
C       0.884500    0.050800    4.026100
H       0.264300    0.159300    1.982200
C       2.870900   -1.207700    4.474900
H       3.825500   -2.110500    2.783800
C       1.818200   -0.424800    4.945500
H       0.072900    0.695300    4.355900
H       3.638300   -1.561600    5.159700
H       1.740000   -0.172500    5.999200
C      -1.097500    2.564900   -0.257300
H      -1.873300    1.874200   -0.655000
C      -1.619300    3.054500    1.101300
H      -2.535400    3.644300    0.976100
H      -1.840500    2.209200    1.761400
H      -0.862700    3.685000    1.565600
C      -1.020900    3.705200   -1.280000
H      -2.028400    4.090200   -1.483500
H      -0.406500    4.519800   -0.897100
H      -0.589400    3.358700   -2.223300
C      -1.079300   -2.086000   -2.490700
C      -0.087000   -1.218400   -3.023700
C      -0.677800    0.073200   -3.200300
C      -2.044400   -0.013300   -2.798700
C      -2.289300   -1.351900   -2.369800
C      -0.912900   -3.557000   -2.250500
H       0.078900   -3.797300   -1.855200
H      -1.040400   -4.122300   -3.184600
H      -1.653600   -3.934400   -1.539200
C       1.207000   -1.669000   -3.625200
H       2.025800   -0.985800   -3.396700
H       1.093800   -1.738400   -4.717500
H       1.492200   -2.658500   -3.260100
C      -0.034800    1.214400   -3.937300
H      -0.766200    1.988300   -4.186600
H       0.396000    0.857600   -4.881900
H       0.770400    1.690900   -3.370900
C      -3.096700    1.041000   -2.989100
H      -3.866100    0.997800   -2.212500
H      -3.601000    0.906900   -3.956700
H      -2.676700    2.051000   -2.980800
C      -3.624200   -1.954800   -2.068000
H      -3.569400   -2.698200   -1.265500
H      -4.007600   -2.473800   -2.958100
H      -4.364800   -1.208000   -1.776500
125
Molecule 8, energetically disfavored isomer, Single point energy = -2353.296644 a.u., G = -2353.389067 a.u.
Zr     -0.254500   -0.980700   -0.108700
N       0.715400    0.800500   -0.450500
N      -0.091500    1.473200    0.523700
C       0.511200    1.928700    1.767000
C       0.633800    3.298600    2.032900
H       0.336700    4.022600    1.282000
C       1.118300    3.737700    3.262600
H       1.197200    4.805100    3.452800
C       1.503700    2.820600    4.238700
H       1.872400    3.163600    5.201900
C       1.422400    1.457200    3.958300
H       1.737100    0.728300    4.701700
C       0.930500    1.013000    2.732100
H       0.895000   -0.042000    2.493700
C      -1.047600    2.418400   -0.002500
C      -0.915100    2.981000   -1.271500
H      -0.051800    2.710300   -1.870400
C      -1.840700    3.932500   -1.705200
H      -1.720600    4.376600   -2.690800
C      -2.887900    4.337300   -0.880700
H      -3.596000    5.089100   -1.218900
C      -3.019700    3.764200    0.385700
H      -3.841400    4.055000    1.034900
C      -2.114500    2.803600    0.820000
H      -2.221800    2.353700    1.802100
N       1.736400   -1.444200    0.748300
C       2.046700    1.278600   -0.661600
C       2.885800   -0.958200    0.100400
C       1.927100   -2.623400    1.639600
H       0.942500   -2.759600    2.088400
C       2.900100   -2.325000    2.786500
H       3.930300   -2.275700    2.423200
H       2.663200   -1.378000    3.282500
H       2.850500   -3.124400    3.536300
C       2.276200   -3.996900    1.051200
H       1.563800   -4.291600    0.281400
H       3.279900   -4.016800    0.625100
H       2.218500   -4.743100    1.855700
N       3.025400    0.505100   -0.016600
N       2.159300    2.320200   -1.397100
N       3.773100   -1.780700   -0.314700
C       4.915800   -1.757600   -1.205600
H       4.547700   -2.315800   -2.083700
C       4.222400    1.171500    0.582600
H       4.943200    1.395200   -0.208400
C       4.942000    0.310200    1.617500
H       4.286200    0.094000    2.464900
H       5.312500   -0.633700    1.220100
H       5.797900    0.882600    1.992500
C       3.869500    2.489500    1.275300
H       3.239700    3.141300    0.672200
H       3.355100    2.306200    2.221200
H       4.800800    3.025800    1.492400
C       3.354700    2.944300   -1.932900
H       4.284900    2.626700   -1.444400
C       3.229100    4.464800   -1.789700
H       4.099000    4.966800   -2.229400
H       2.327300    4.815400   -2.303800
H       3.156100    4.768900   -0.740800
C       3.461200    2.578700   -3.419100
H       4.333100    3.067900   -3.869500
H       3.561700    1.498900   -3.562300
H       2.563800    2.908800   -3.954500
C       5.509700   -0.462600   -1.775600
H       4.735900    0.227900   -2.118400
H       6.157000    0.051700   -1.058800
H       6.133700   -0.720000   -2.640400
C       6.032400   -2.628100   -0.612100
H       5.638500   -3.599700   -0.299600
H       6.822600   -2.794100   -1.353900
H       6.491800   -2.151500    0.261900
N      -1.060800   -1.573300    1.968500
N      -2.572800   -0.652000    0.578100
C      -0.871500   -1.926700    3.374900
H       0.114900   -1.625000    3.739500
H      -0.941800   -3.018400    3.505000
C      -2.005200   -1.202300    4.118000
H      -2.305000   -1.709400    5.040400
H      -1.681700   -0.187000    4.375100
C      -3.117300   -1.145600    3.065900
H      -3.727600   -2.057000    3.103400
H      -3.796900   -0.293300    3.151600
C      -2.298700   -1.116100    1.787600
C      -3.883000   -0.326700    0.192000
C      -4.099400    0.694100   -0.748300
H      -3.247200    1.250800   -1.121300
C      -5.379900    1.003900   -1.205700
C      -6.474100    0.286300   -0.708200
H      -7.476800    0.522100   -1.062000
C      -6.295800   -0.738300    0.220500
C      -5.001100   -1.044800    0.647700
H      -4.861700   -1.894100    1.309400
C      -5.593400    2.096900   -2.221800
H      -6.165000    2.930400   -1.793800
H      -6.160800    1.730200   -3.086100
H      -4.642800    2.499600   -2.581700
C      -7.475200   -1.508500    0.758300
H      -8.323900   -1.476100    0.067200
H      -7.818100   -1.093800    1.715800
H      -7.223600   -2.560600    0.933700
C      -0.747000   -3.136200   -1.487800
C       0.503200   -2.666100   -1.991100
C       0.280000   -1.401900   -2.596700
C      -1.123800   -1.129100   -2.560200
C      -1.757700   -2.215100   -1.904200
C      -1.051800   -4.491800   -0.914200
H      -0.151400   -5.012200   -0.579500
H      -1.537700   -5.131200   -1.665100
H      -1.731300   -4.433300   -0.056200
C       1.768100   -3.458400   -2.130800
H       2.559500   -3.127800   -1.451400
H       2.139000   -3.365500   -3.159700
H       1.586300   -4.522400   -1.952300
C       1.283600   -0.611400   -3.379500
H       1.143600    0.465300   -3.247500
H       1.197200   -0.829300   -4.454500
H       2.307900   -0.851600   -3.078300
C      -1.782800   -0.009300   -3.309000
H      -2.863800   -0.000800   -3.152500
H      -1.603700   -0.118000   -4.388000
H      -1.397900    0.973100   -3.015600
C      -3.216800   -2.543400   -1.883800
H      -3.536600   -2.966100   -0.927000
H      -3.425000   -3.297900   -2.656900
H      -3.849000   -1.677900   -2.086300
